# Supplementary material for: Self-Powered and Autonomous Vibrational Wake-Up System Based on Triboelectric Nanogenerators and MEMS Switch
Source: MDPI journal article supplement (doi:10.3390/s22103752), 2022-05-14
Supplement: s1 [file s1]

## Supplementary Materials

# Self-Powered and Autonomous Vibrational Wake-Up System Based on Triboelectric Nanogenerators and MEMS Switch

Yuan Lin <sup>1,2</sup>, Youchao Qi <sup>2,3</sup>, Jiaqi Wang <sup>2</sup>, Guoxu Liu <sup>2,3</sup>, Zhaozheng Wang <sup>2,3</sup>, Junqing Zhao <sup>2,3</sup>, Yi Lv <sup>2,3</sup>, Zhi Zhang <sup>2,3</sup>, Ning Tian <sup>4</sup>, Mengbi Wang <sup>5</sup>, Yuanfen Chen <sup>1,6,\*</sup> and Chi Zhang <sup>1,2,3,6,\*</sup>

<sup>1</sup> School of Mechanical Engineering, Guangxi University, Nanning 530004, China; 1911301021@st.gxu.edu.cn

<sup>2</sup> CAS Center for Excellence in Nanoscience, Beijing Key Laboratory of Micro-Nano Energy and Sensor, Beijing Institute of Nanoenergy and Nanosystems, Chinese Academy of Sciences, Beijing 100083, China; qiyouchao@163.com (Y.Q.); 202010410039@imut.edu.cn (J.W.); liuguoxu@binn.cas.cn (G.L.); wangzhaozheng@binn.cas.cn (Z.W.); zhaojunqing@binn.cas.cn (J.Z.); lvyi@binn.cas.cn (Y.L.); zhangzhi@binn.cas.cn (Z.Z.)

<sup>3</sup> School of Nanoscience and Technology, University of Chinese Academy of Sciences, Beijing 100049, China

<sup>4</sup> Tsinghua Innovation Center in Zhuhai, Zhuhai 519080, China; tianning2001@vip.sina.com

<sup>5</sup> State Key Laboratory of Precision Measurement Technology and Instruments Department of Precision Instrument Tsinghua University, Beijing 100084, China; wmb@mail.tsinghua.edu.cn

<sup>6</sup> Center on Nanoenergy Research, School of Physical Science and Technology, Guangxi University, Nanning 530004, China

\* Correspondence: yuanfenchen@gxu.edu.cn (Y.C.); czhang@binn.cas.cn (C.Z.)

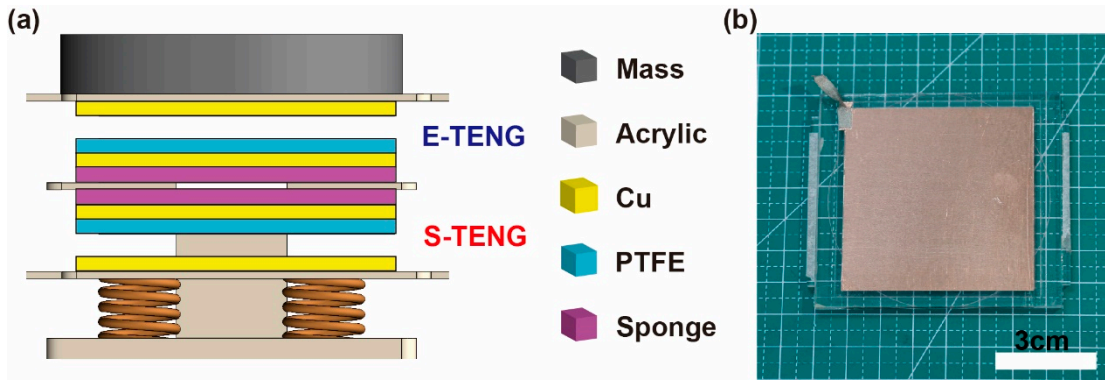

**Figure S1.** The structure schematic of the integrated vibration TENG. (a) The 3D structure schematic of the integrated vibration TENG. (b) The photograph of the actual contact area for TENG.

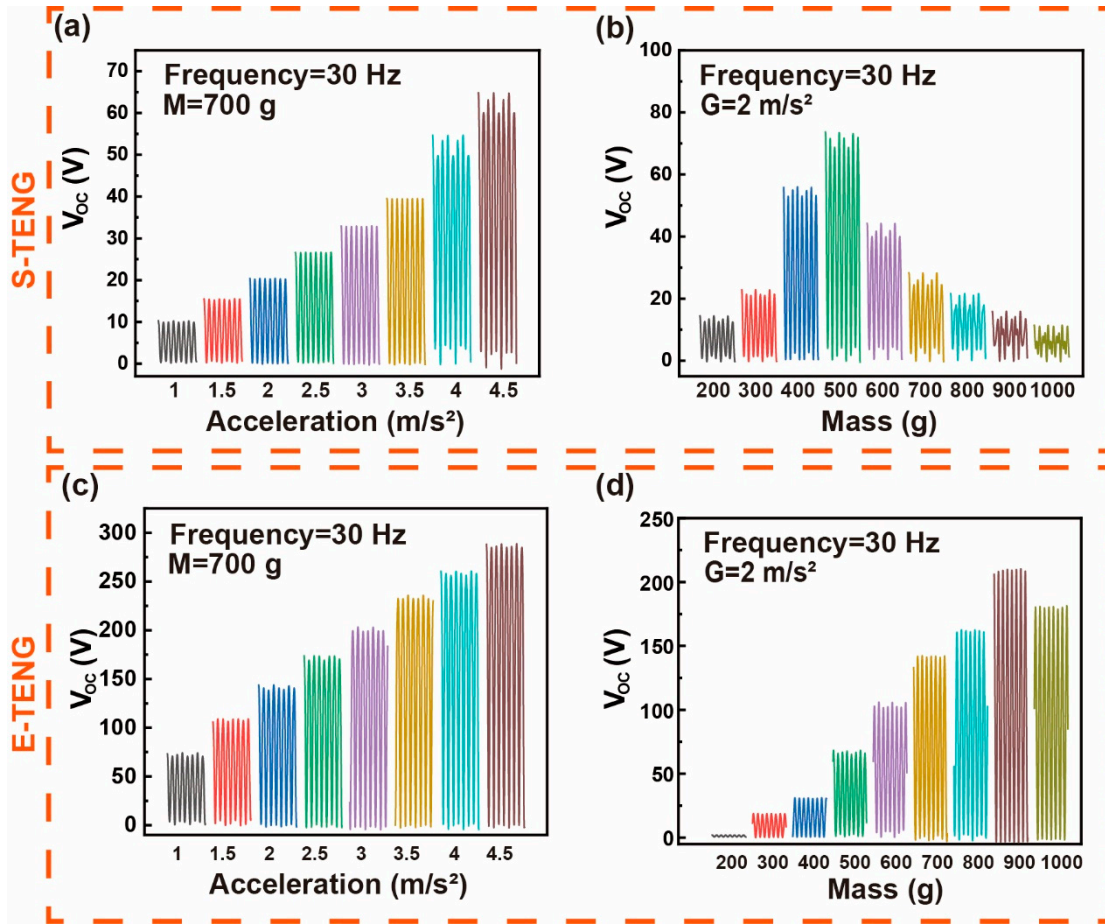

**Figure S2.** Characteristics of the S-TENG and E-TENG. (a) (b) The open-circuit voltage waveforms of the S-TENG at different accelerations and mass. (c) (d) The open-circuit voltage waveforms of the E-TENG at different accelerations and mass.

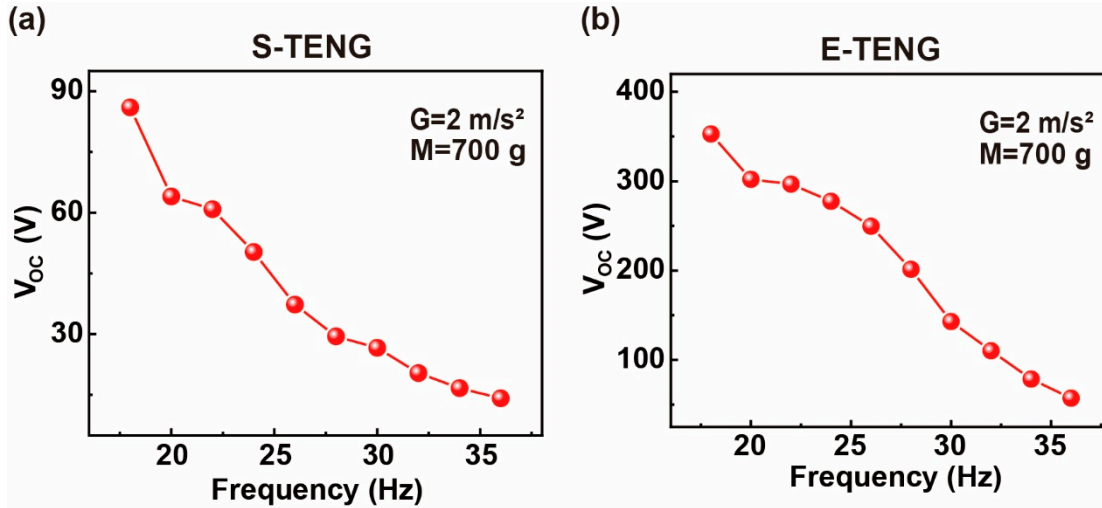

Figure S3. The open-circuit voltage of S-TENG and E-TENG in different frequencies.

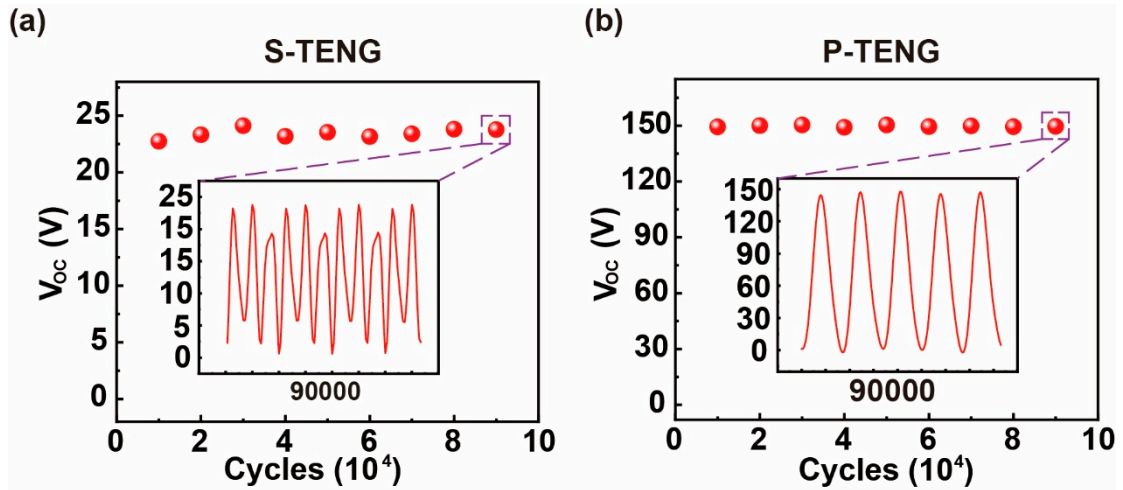

Figure S4. The durability test results of the S-TENG and E-TENG.

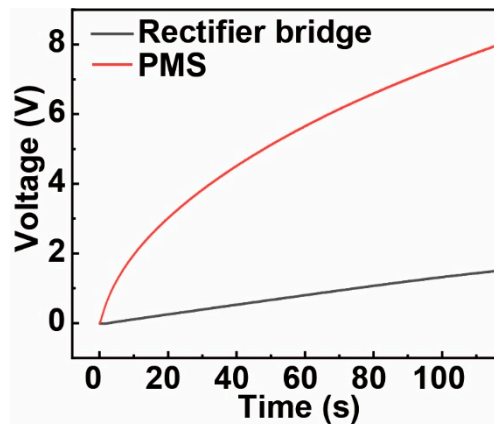

Figure S5. Comparison of direct charge circuit with only one rectifier bridge and through the PMS charging for a 330  $\mu\text{F}$  capacitance.

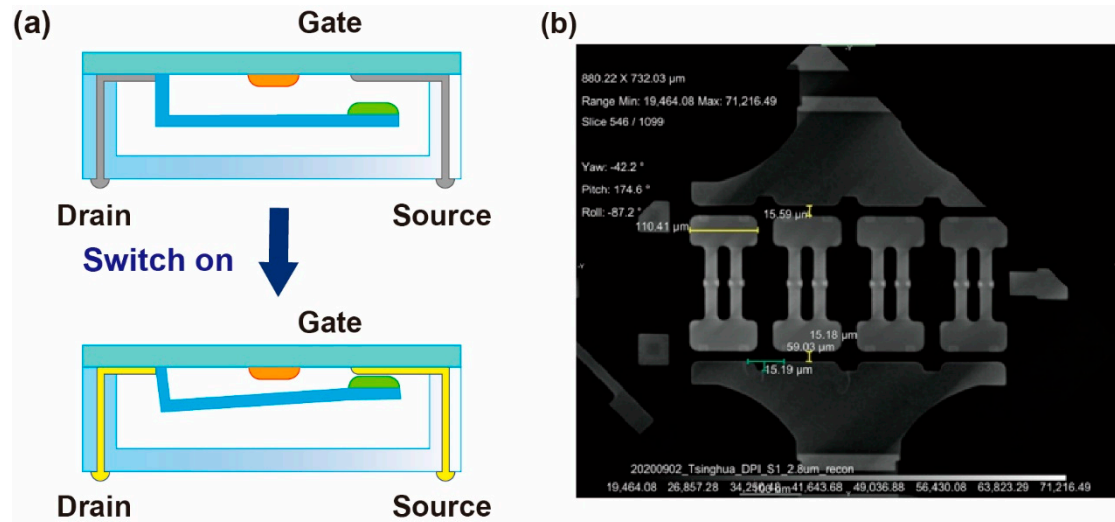

**Figure S6.** Structure and microstructural diagram of MEMS switch.

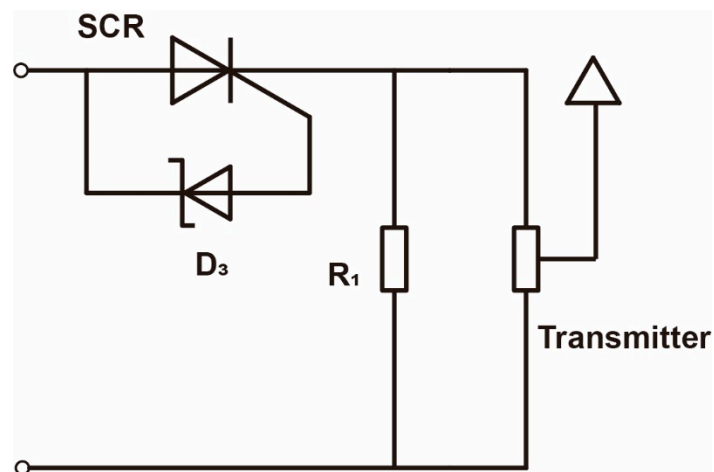

**Figure S7** The circuit schematic diagram of the load. The SCR model is EC103M1. The  $D_3$  is a Zener diode with a value of 3.3V. The  $R_1$  has a resistance of 4.7k $\Omega$ , which acts as a discharge resistor to prevent the SCR from closing until the signal has been sent completely.

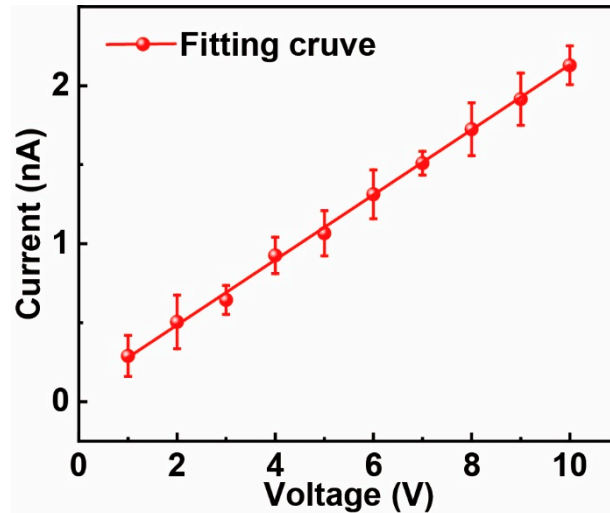

**Figure S8. Leakage current of MEMS switch.** The leakage current increases linearly as the voltage between beam and contact increasing.

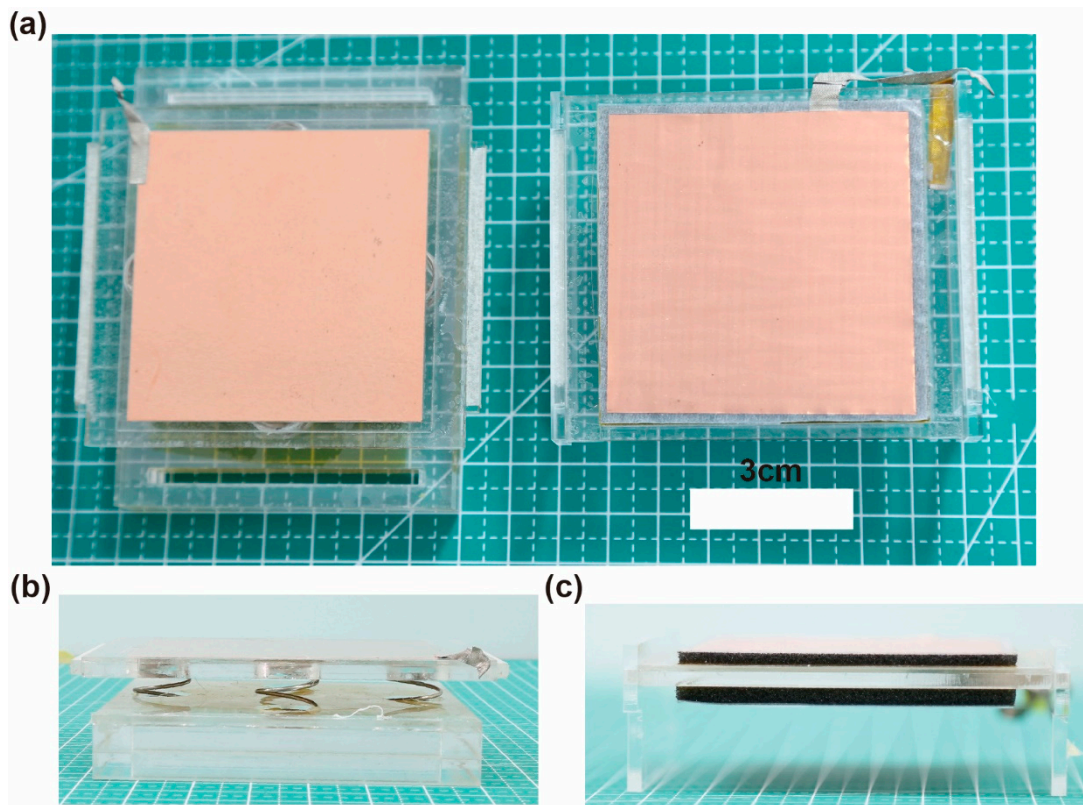

**Figure S9. The optical picture of the specific internal structure of the integrated TENG.** (a) The photo of the base plate, moving layer, and stationary layer. (b) Side view of the base plate and the moving layer. (c) Side view of the stationary layer.

#### Supplementary Videos:

**Video S1.** The working demo of SAVWS.
